# Supplementary material
Source: publisher site journal article supplement (http://scielo.br/pdf/rbef/v46s1/1806-9126-rbef-46-suppl1-e20240084.pdf)
Supplement: Supplementary file 1 [file 1806-9126-rbef-46-suppl1-e20240084.pdf]

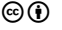

# Efeito Magnetoimpedância como uma ferramenta para investigação da dinâmica da magnetização em sistemas nanoestruturados

Marcio Assolin Correa<sup>\*1</sup>, Edimilson Felix da Silva<sup>1</sup>, Matheus Gamino<sup>1</sup>, Felipe Bohn<sup>1</sup>

<sup>1</sup>Universidade Federal do Rio Grande do Norte, Departamento de Física, Natal, RN, Brasil.

Recebido em 08 de março de 2024. Aceito em 18 de março de 2024.

Aqui abordamos o efeito Magnetoimpedância e demonstramos que este pode nos auxiliar no estudo da dinâmica da magnetização em sistemas nanoestruturados. Especificamente, exploramos uma forma acessível, mas robusta, de calcular o fenômeno da Magnetoimpedância em sistemas na forma de filmes finos. Para verificar a robustez de nossa abordagem teórica, produzimos um filme fino ferromagnético de  $\text{Ni}_{81}\text{Fe}_{19}$ , uma liga amplamente conhecida na comunidade de magnetismo, e realizamos sua caracterização magnética quase-estática e dinâmica. Nosso resultados, além de mostrar a concordância entre teoria e experimento, trazem uma forma simples para descrever sistema ferromagnéticos e suas interações com campos magnético estáticos e alternados, simultaneamente. Através da investigação das propriedades magnéticas de diferentes sistemas podemos produzir uma ampla gama de dispositivos sensores para diferentes aplicações tecnológicas.

**Palavras-chave:** Dinâmica da magnetização, magnetoimpedância, filmes finos.

Here we address the Magnetoimpedance effect and demonstrate that it can help us in the study of the dynamics of magnetization in nanostructured systems. Specifically, we explore an accessible, robust approach to calculate the Magnetoimpedance phenomenon in thin film systems. To verify the robustness of our theoretical approach, we produced a ferromagnetic thin film of  $\text{Ni}_{81}\text{Fe}_{19}$ , an alloy widely known in the magnetism community, and performed its quasi-static and dynamic magnetic characterization. Our results, in addition to revealing the agreement between theory and experiment, provide a simple way to describe ferromagnetic systems and their interactions with static and alternating magnetic fields, simultaneously. Through investigating the magnetic properties of different systems, we can produce a wide range of sensor devices for various technological applications.

**Keywords:** Magnetization dynamics, magnetoimpedance, thin films.

## 1. Introdução

Experimentos explorando a impedância elétrica têm recebido atenção nas últimas décadas devido ao grande potencial de aplicação nos mais diferentes dispositivos tecnológicos. Especificamente, alterações da impedância mediante pequenas variações de algum parâmetro externo tornam esta quantidade física muito promissora, concorrendo para aplicação de materiais com respostas elétricas otimizadas em uma ampla gama de dispositivos sensores.

Diferentemente de uma medida de resistência elétrica, na qual uma corrente elétrica contínua flui através da amostra, em uma medida de impedância, o material é submetido a uma corrente alternada  $I_{ac}$ . No caso de metais, a impedância elétrica  $Z$  tem uma forte dependência com a frequência  $f$  da corrente aplicada. Esta dependência ocorre devido ao Efeito Pele, amplamente conhecido como Efeito *Skin*. Este é responsável pela concentração da corrente elétrica alternada, e também do campo magnético alternado, na periferia do condutor

quando a frequência da corrente elétrica é aumentada para valores da ordem de dezenas de MHz. Esta situação pode ser visualizada na Fig. 1.

O Efeito *Skin* é observado em todos os metais, ferromagnéticos ou não. Em metais não-ferromagnéticos, a permeabilidade magnética  $\mu$  é uma quantidade constante e, conseqüentemente, a concentração do campo eletromagnético na periferia do material não modifica a permeabilidade magnética local. Por outro lado, em metais ferromagnéticos, a concentração da corrente alternada induz uma forte mudança na permeabilidade magnética transversal  $\mu_t$ , influenciando, assim, o valor da impedância elétrica do material. Adicionalmente, através da submissão de um material metálico e ferromagnético a um campo magnético externo  $\vec{H}$ , é possível manipular e/ou otimizar a impedância elétrica do sistema. A este fenômeno, isto é, à variação da impedância elétrica de um material observada a partir da aplicação simultânea de uma corrente  $I_{ac}$  e um campo magnético  $\vec{H}$ , é dado o nome de Efeito Magnetoimpedância (MI).

O fenômeno MI foi descoberto ainda nos anos de 1930 por E. P. Harrison e colaboradores [1]. Contudo, não teve

\*Endereço de correspondência: marciocorrea@fisica.ufrn.br

apelo significativo para aplicações tecnológicas na época. Apenas na década de 1990, o assunto voltou à tona devido à descoberta da Magnetorresistência Gigante [2]. A partir desta revelação, e com o desenvolvimento de aparatos experimentais mais sofisticados, com capacidade de operar em altas frequências, o Efeito Magnetoimpedância voltou a atrair a atenção da comunidade científica [3–8]. Atualmente, a MI tem sido explorada em diferentes campos da tecnologia, como aplicações na área biomédica [9, 10], em sistema de detecção de campos magnéticos [11], na indústria do petróleo [12], entre outras [13].

Muito além das aplicações tecnológicas, o efeito Magnetoimpedância também é uma excelente ferramenta para a investigação da dinâmica da magnetização em materiais nanoestruturados, tais como na geometria de filmes finos. Do ponto de vista teórico, o Efeito Magnetoimpedância, em frequências moderadas (dezenas de MHz) e altas (na faixa de GHz), pode fornecer *insights* valiosos sobre como a magnetização de um determinado material se comporta quando submetido, simultaneamente, a campos magnéticos quase-estáticos e alternados. A partir do perfil das curvas de impedância e sua dependência com o campo magnético  $\vec{H}$  e a frequência  $f$  da corrente alternada, assinaturas de diferentes mecanismos atuando na dinâmica do sistema são acessadas, e parâmetros físicos do material podem ser explorados. Um destes parâmetros é o fator de amortecimento de spin  $\alpha$ . O fator de amortecimento comanda a rapidez com que o vetor magnetização  $\vec{M}$  do material precessiona em torno do campo magnético quase-estático  $\vec{H}$ . Em termos práticos, o controle de  $\alpha$  possibilita o desenvolvimento de materiais com uma dinâmica da magnetização controlada frente à aplicação de um campo magnético, permitindo a otimização de sensores ultra-rápidos.

Neste trabalho, visamos abordar questões importantes associadas à dinâmica da magnetização, bem como destacar o grande potencial tecnológico de materiais magnéticos e do efeito MI. Assim, exploramos uma forma acessível, mas robusta, de calcular o fenômeno da Magnetoimpedância em sistemas na forma de filmes finos.

Adicionalmente, produzimos, experimentalmente, um amostra com propriedades magnéticas específicas a fim de corroborar o potencial do modelo proposto.

Desta forma, demonstramos a robustez da abordagem teórica para descrever os resultados experimentais, considerando curvas de magnetização e de magnetoimpedância obtidas em um filme fino ferromagnético de Ni<sub>81</sub>Fe<sub>19</sub>, uma liga amplamente conhecida na comunidade de magnetismo.

## 2. Abordagem Teórica

De forma geral, a dinâmica da magnetização é descrita pela equação de Landau-Lifshitz-Gilbert (LLG), dada

por [14]

$$\frac{d\vec{M}}{dt} = -\gamma(\vec{M} \times \vec{H}_{eff}) - \gamma \frac{\alpha}{M} \left[ \vec{M} \times (\vec{M} \times \vec{H}_{eff}) \right] \quad (1)$$

onde  $\vec{M}$  é o vetor magnetização,  $\vec{H}_{eff}$  é o campo magnético efetivo e  $\gamma = |\gamma_G|/(1 + \alpha^2)$ , sendo  $\gamma_G$  o fator giromagnético e  $\alpha$  o fator de amortecimento. Em um experimento de MI, o campo magnético efetivo apresenta duas contribuições e pode ser escrito como  $\vec{H}_{eff} = (\vec{H} + \vec{H}_\xi) + \vec{h}_{ac}$ . O primeiro termo,  $(\vec{H} + \vec{H}_\xi)$ , corresponde à componente estática do campo. Ela contém o campo magnético externo  $\vec{H}$  e o campo magnético interno  $\vec{H}_\xi = -\frac{\partial \xi}{\partial \vec{M}}$  devido às diferentes contribuições para a densidade de energia livre magnética  $\xi$  com origem nas anisotropias e campos magnéticos internos induzidos. O segundo termo, por outro lado, corresponde ao campo magnético alternado  $\vec{h}_{ac}$  gerado pela corrente elétrica  $I_{ac}$  fluindo pela amostra durante a medida de impedância. Este último, por sua vez, induz desvios do vetor magnetização a partir da posição de equilíbrio estático. É importante salientar que a Eq. (1) é uma expressão geral que pode ser aplicada para descrever a dinâmica da magnetização para qualquer sistema, com qualquer geometria.

Para a compreensão do Efeito Magnetoimpedância, é necessário o conhecimento da permeabilidade magnética transversal  $\mu_t$  do material. Este objetivo é atingido considerando-se como ocorre a transição da magnetização quando esta evolui de um estado de equilíbrio para outro sob a ação de campos estáticos e alternados. No caso de sistemas na geometria de filmes finos, e assumindo que a magnetização permanece no plano do filme, uma situação frequentemente observada para materiais magnéticos macios, a obtenção de uma expressão para  $\mu_t$  se torna simples. Especificamente para esta situação, a permeabilidade magnética transversal pode ser descrita por [14, 15]

$$\mu_t = 1 + 4\pi\kappa \sin^2 \varphi_M \times \left[ \begin{array}{l} (\omega_r^2 - \omega^2)(1 + \alpha^2)\gamma\xi_{\theta\theta} + \alpha M_s \omega^2 \Delta\omega \\ + i \left[ - (1 + \alpha^2)\gamma\omega\Delta\omega\xi_{\theta\theta} + \alpha M_s \omega (\omega_r^2 - \omega^2) \right] \end{array} \right], \quad (2)$$

onde  $\kappa$  é definido como

$$\kappa = \frac{\gamma}{(\omega_r^2 - \omega^2) + \omega^2 \Delta\omega^2}, \quad (3)$$

$\omega_r$  e  $\Delta\omega$  são as bem conhecidas frequência de ressonância e a largura de linha de absorção, dadas por

$$\omega_r = \frac{\gamma}{M \sin \theta_M} \sqrt{1 + \alpha^2} \sqrt{\xi_{\theta\theta}\xi_{\varphi\varphi} - \xi_{\theta\varphi}^2}, \quad (4)$$

e

$$\Delta\omega = \frac{\alpha\gamma}{M} \left( \xi_{\theta\theta} + \frac{\xi_{\varphi\varphi}}{\sin^2 \theta_M} \right). \quad (5)$$

Através das Eqs. (2), (4) e (5), é possível perceber que a chave para a descrição destes sistemas reside em

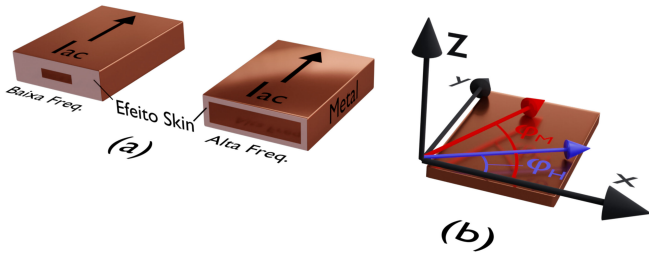

**Figura 1:** (a) Representação esquemática do Efeito *Skin* em um material metálico no qual flui uma corrente elétrica alternada. Para baixas frequências, a corrente elétrica se distribui através da maior parte da seção transversal da amostra (imagem à esquerda). Por outro lado, à medida que a frequência aumenta, e especialmente em frequências mais altas, a corrente elétrica alternada tende a se concentrar na periferia da amostra (imagem à direita). (b) Representação vetorial da magnetização (seta vermelha) e do campo magnético (seta azul). Aqui,  $\varphi_H$  e  $\varphi_M$  são os ângulos que, respectivamente, campo magnético  $\vec{H}$  e magnetização  $\vec{M}$  fazem com o eixo  $x$ , enquanto que  $\theta_H$  e  $\theta_M$ , não ilustrados, são os ângulos correspondentes em relação ao eixo  $z$ . Neste caso apresentado,  $\vec{H}$  e  $\vec{M}$  estão no plano do filme ferromagnético (plano  $xy$ ), de modo que  $\theta_H = 90^\circ$  e  $\theta_M = 90^\circ$ .

conhecer a densidade de energia livre magnética  $\xi$  e as derivadas segundas  $\xi_{\theta\theta}$ ,  $\xi_{\varphi\varphi}$ ,  $\xi_{\varphi\theta}$  e  $\xi_{\theta\varphi}$  da densidade de energia livre magnética em uma posição de equilíbrio da magnetização, definida pelos ângulos  $\theta_M$  e  $\varphi_M$ , conforme representado na Fig. 1(c).

Esta descrição geral da permeabilidade e, conseqüentemente, do comportamento magnético dinâmico corresponde a uma ferramenta poderosa, uma vez que pode ser empregada para qualquer estrutura magnética, utilizando uma configuração de energia adequada. Tomaremos como exemplo uma das densidades de energia livre magnética mais utilizadas em estudos de cálculos numéricos de curvas de magnetização; aqui, representaremos um sistema com uma anisotropia magnética uniaxial. Para este tipo de sistema,  $\xi$  pode ser escrita como [14, 15]

$$\xi = -\vec{M} \cdot \vec{H} + 2\pi M_s^2 \left( \hat{M} \cdot \hat{n} \right)^2 - \frac{H_k}{2M_s} \left( \vec{M} \cdot \hat{u}_k \right)^2. \quad (6)$$

O primeiro termo é a densidade de energia Zeeman, que descreve a interação da magnetização  $\vec{M}$  com o campo magnético externo  $\vec{H}$ . O segundo termo é a densidade de energia desmagnetizante para um sistema planar fino, que representa a anisotropia de forma responsável por fazer com que a magnetização esteja no plano do filme. Neste termo,  $M_s$  é a magnetização de saturação do material,  $\hat{M}$  é o versor que descreve a direção da magnetização e  $\hat{n}$  o versor normal ao plano do filme. Finalmente, o último termo descreve a anisotropia magnética uniaxial, com  $H_k = 2K_u/M_s$ , onde  $K_u$  é a constante de anisotropia uniaxial do sistema, anisotropia esta alinhada na direção  $\hat{u}_k$ .

Como um primeiro teste para este modelo teórico, serão obtidas numericamente curvas de magnetização que

representam as propriedades magnéticas quase-estáticas. Os cálculos serão realizados considerando-se os seguintes parâmetros: magnetização de saturação  $M_s = 780$  emu/cm<sup>3</sup>, campo de anisotropia  $H_k = 20$  Oe, cuja anisotropia é dada por  $\theta_k = 90^\circ$  e  $\varphi_k = 0^\circ$ . Estes parâmetros descrevem bem uma nanoestrutura de Ni<sub>81</sub>Fe<sub>19</sub> na forma de filme fino. Esta é uma das mais importantes ligas ferromagnéticas, denominada Permalloy. Por fim, vale ressaltar que os parâmetros aqui apresentados estarão no *cgs*, sistema de unidades preferido para pesquisadores que estudam as propriedades magnéticas de materiais.

A partir da minimização da Eq. (6), são obtidos os valores de  $\theta_M$  e  $\varphi_M$  para cada valor de campo magnético  $\vec{H}$ . Neste caso, tendo em mãos  $\theta_M$  e  $\varphi_M$  para cada valor de campo, é possível calcular o valor da projeção da magnetização na direção do campo magnético, e construir, assim, a curva de magnetização completa. A Figura 2(a) apresenta os resultados das curvas de magnetização obtidas para o campo magnético orientado em três orientações diferentes,  $\varphi_H = 0^\circ, 45^\circ$  e  $90^\circ$ . Inicialmente, consideramos o cálculo no qual o campo magnético está ao longo do eixo de fácil magnetização, ou seja,  $\varphi_H = \varphi_k = 0^\circ$ . Como resultado, temos uma curva de magnetização com formato retangular (linha sólida preta), com campo coercivo  $H_c = H_k$ . A medida que a orientação do campo magnético é alterada em direção ao eixo  $y$ , o formato da curva muda, atingindo uma curva com área interna nula (linha amarela) em  $\varphi_H = 90^\circ$ , uma assinatura de um eixo de difícil magnetização. Mesmo considerando-se um sistema bastante simples, é possível observar a dependência do formato das curvas de magnetização, campo coercivo e magnetização remanente com a orientação do campo magnético ao qual o sistema é submetido. Este fato mostra que o processo de minimização da densidade de energia livre magnética de um sistema pode ser uma interessante ferramenta para estudar processos de magnetização quase-estáticos.

Iniciando a investigação de aspectos dinâmicos da dinâmica da magnetização, daremos continuidade aos estudos teóricos abordando o cálculo do efeito magnetoimpedância de filmes finos e sua relação com a permeabilidade magnética transversal previamente mencionada. Um modelo para a impedância elétrica para sistemas planares foi proposto por L. Kraus [16] e se baseia na solução de um problema de condição de contorno específico para este tipo de sistema. Em particular, a impedância de um filme fino com espessura  $s$  pode ser calculada através de

$$\frac{Z}{R_{dc}} = \kappa \frac{s}{2} \cot \left( \kappa \frac{s}{2} \right) \quad (7)$$

onde  $R_{dc}$  é a resistência elétrica *dc*,  $\kappa = (1 - i)/\delta$ , onde  $\delta$  é a profundidade de penetração associada ao efeito *Skin*, que matematicamente esta conectada com a permeabilidade magnética transversal  $\mu_t$  através de

$$\delta = \sqrt{2\rho/\omega\mu_t} \quad (8)$$

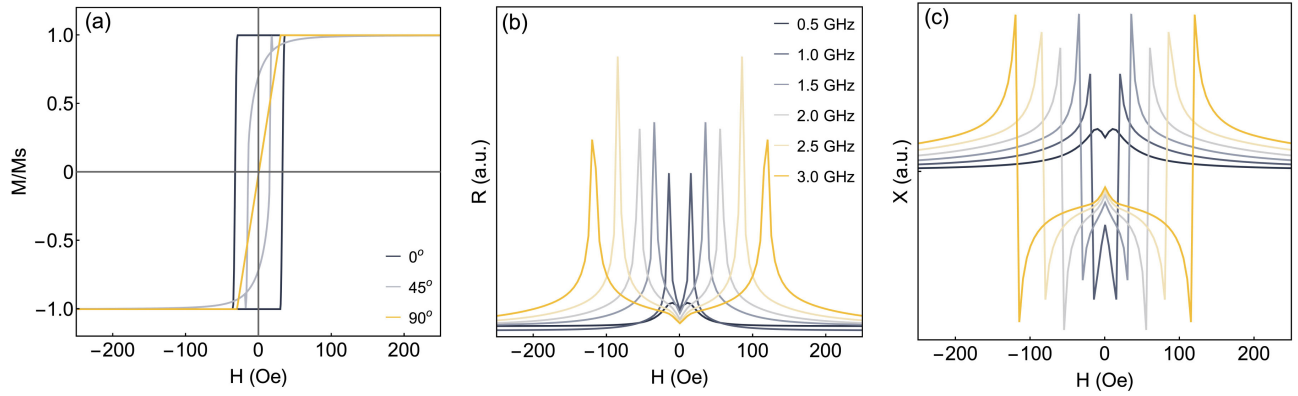

**Figura 2:** (a) Curvas de magnetização de um sistema que descreve um filme fino com anisotropia uniaxial induzida com  $M_s = 780$  emu/cm<sup>3</sup>,  $H_k = 20$  Oe,  $\theta_k = 90^\circ$  e  $\varphi_k = 0^\circ$ , calculadas para diferentes valores de  $\varphi_H$ . Componentes (b) real  $R$  e (c) imaginária  $X$  da impedância  $Z$  em função do campo magnético, para valores selecionados de frequência da corrente elétrica alternada  $I_{ac}$ . As duas componentes de  $Z$  foram calculadas para o sistema descrito em (a) e assumindo que  $\theta_H = 90^\circ$ ,  $\varphi_H = 90^\circ$  e que  $I_{ac}$  flui na mesma direção do campo magnético, ou seja, na direção  $y$ . Ademais, os valores apresentados estão normalizados, ou seja, descontados da contribuição metálica que é encontrada em sistemas reais.

sendo  $\rho$  a resistividade elétrica do material e  $\omega = 2\pi f$ , com  $f$  sendo a frequência da corrente alternada que atravessa o condutor durante o experimento.

Para o cálculo seguinte, devem ser considerados os valores de referência para as constantes contidas nestas expressões acima mencionadas. Neste caso, assumimos uma amostra na forma de filme fino com espessura de  $s = 100$  nm, resistividade da liga de Ni<sub>81</sub>Fe<sub>19</sub> tendo valor médio de  $\rho = 7.56 \times 10^{-6}$  Ω/cm, fator giromagnético  $\gamma$  para a liga em questão de  $18.6 \times 10^6$  Oe<sup>-1</sup>s<sup>-1</sup> [17] e, para uma análise inicial, fator de amortecimento  $\alpha = 0.001$ , que corresponde a um valor característico para filmes finos ferromagnéticos com espessuras da ordem de  $s$ .

As Figuras 2(b,c) mostram os cálculos numéricos obtidos para as componentes real  $R$  e imaginária  $X$  da impedância  $Z$  em função do campo magnético para valores de frequência selecionados. Vale ressaltar que o modelo aqui apresentado não considera a dependência com a frequência da contribuição metálica da impedância, usualmente ajustada durante o procedimento experimental. Visto que o comportamento magnético é dependente da orientação de  $\vec{H}$  em relação à anisotropia magnética do sistema investigado, sendo  $\theta_k = 90^\circ$  e  $\varphi_k = 0^\circ$ , optamos por analisar aqui os resultados obtidos quando o campo é descrito por  $\theta_H = 90^\circ$  e  $\varphi_H = 90^\circ$ . Nesta configuração,  $\vec{H} \perp \hat{u}_k$  e  $\vec{h}_{ac} \parallel \hat{u}_k$ . Esta configuração de campos induz o bem conhecido comportamento convencional de sistemas anisotrópicos, caracterizado por uma estrutura de duplo pico, simétrico em torno de  $H = 0$ , com os picos tendo amplitudes semelhantes [4, 18–20]. Além disto, através da consideração de resultados obtidos em uma ampla faixa de frequência, podemos identificar no comportamento magnético impressões digitais de diferentes mecanismos atuando na dinâmica, isto é, a influência do efeito *Skin* e da ressonância ferromagnética no efeito magnetoimpedância. Em frequências baixas, não mostradas aqui, a posição dos picos permanece inalterada,

próxima ao campo de anisotropia da amostra; e os picos se deslocam para campos mais altos à medida que a frequência aumenta. A evolução da posição dos picos de impedância em campo, com o aumento da frequência, é uma assinatura da ressonância ferromagnética atuando como um dos principais mecanismos modificando a impedância elétrica do sistema. Além disso, percebemos um aumento da intensidade dos picos de impedância em frequências de até 2.5 GHz, seguido por uma diminuição em sua amplitude para frequências maiores. Esta é uma característica normalmente encontrada para sistema de filmes finos de camada simples, um fato verificado nos resultados experimentais que serão discutidos na sequência.

Embora tenhamos analisado as componentes real  $R$  e imaginária  $X$  de  $Z$ , a impedância pode ser calculada por

$$Z = \sqrt{R^2 + X^2}. \quad (9)$$

E, naturalmente, um descrição dos resultados semelhante pode ser realizada quando considerado o valor total da impedância.

### 3. Comparação Com o Experimento

Até este ponto, apresentamos um modelo teórico que descreve as principais características da dinâmica da magnetização de, em princípio, qualquer sistema ferromagnético, desde que sua densidade de energia livre magnética seja escrita apropriadamente. Para verificar sua validade, investigamos aqui as propriedades magnéticas estáticas e dinâmicas de um filme fino ferromagnético de Ni<sub>81</sub>Fe<sub>19</sub> com anisotropia uniaxial. Veja a seção Métodos para maiores informações sobre o procedimento experimental realizado na produção e caracterização da amostra investigada.

As Figuras 3(a,b) apresentam curvas de magnetização obtidas com o campo magnético aplicado em

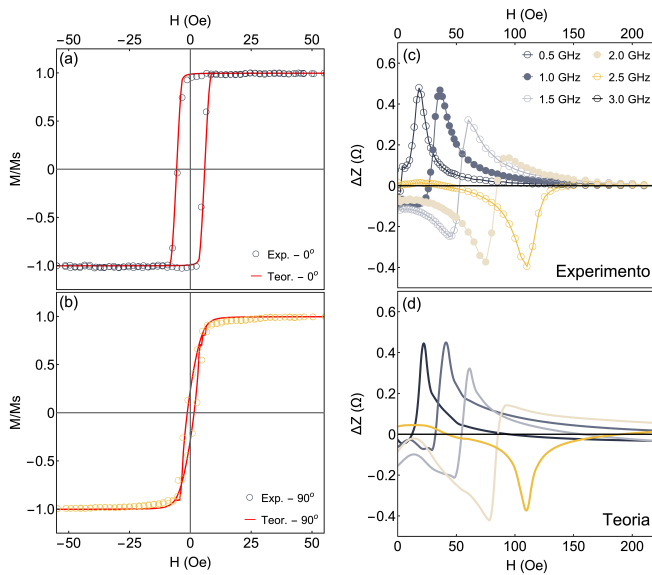

**Figura 3:** Curva de magnetização obtida (a) paralela ( $\varphi_H = 0^\circ$ ) e (b) perpendicular ( $\varphi_H = 90^\circ$ ) à direção definida pelo campo aplicado durante à deposição da amostra. Para as curvas de magnetização, os símbolos são os dados experimentais, enquanto que as linhas sólidas correspondem aos cálculos numéricos. Para os cálculos numéricos, consideramos os seguintes parâmetros:  $M_s = 780 \text{ emu/cm}^3$ ,  $H_k = 5.6 \text{ Oe}$ ,  $\theta_k = 90^\circ$  e  $\varphi_k = 2^\circ$ , calculadas para os valores de  $\varphi_H = 18^\circ$  e  $78^\circ$ , respectivamente para (a,b). (c) Resultados experimentais e (d) cálculos numéricos da impedância elétrica em função do campo magnético para valores selecionados de frequência. Embora as curvas apresentem simetria em torno de campo igual a zero, para uma melhor visualização, apenas os dados para campos positivos são apresentados. As medidas experimentais foram obtidas com campo magnético ao longo do eixo principal da amostra, isto, perpendicular ao eixo fácil definido durante a deposição ( $\varphi_H = 90^\circ$ ). Somados aos parâmetros estabelecidos a partir da modelagem das curvas de magnetização, para o cálculo das curvas de Magnetoimpedância, assumimos:  $\varphi_H = 90^\circ$ ,  $s = 100 \text{ nm}$ ,  $\rho = 7.56 \times 10^{-6} \text{ } \Omega/\text{cm}$ ,  $\gamma = 18.6 \times 10^6 \text{ Oe}^{-1}\text{s}^{-1}$  [17] e  $\alpha = 0.008$ .

duas direções diferentes da amostra, isto é, ao longo e perpendicular à direção definida pelo campo aplicado durante à deposição da amostra. Note que um campo magnético foi aplicado perpendicularmente ao eixo principal da amostra durante a deposição. De fato, através da comparação das curvas, é possível observar que uma anisotropia magnética é induzida durante o crescimento do filme, confirmando um eixo de fácil magnetização orientado perpendicularmente ao eixo principal da amostra. A curva obtida com campo magnético aplicado ao longo da direção definida pelo  $\vec{H}$  durante a deposição apresenta uma alta remanência, evidenciando um formato “quase-retangular”. Este formato de curva é característico para uma situação em que o campo magnético está alinhado a uma direção próxima a um eixo de fácil magnetização. Neste caso, são encontrados campo coercivo  $H_c$  de aproximadamente 5.6 Oe e magnetização remanente muito

próxima à magnetização de saturação. Por outro lado, ao rotacionar o campo magnético em  $90^\circ$ , observamos um curva típica de um condição em que o campo magnético está alinhado a uma direção próxima à de um eixo de difícil magnetização. Havendo o alinhamento perfeito, esperaria-se uma curva sem histerese, o que claramente não é observado.

Vale ressaltar que em amostras reais há mecanismos de dispersão de anisotropia devido ao acúmulo de tensões durante a deposição, fazendo com que existam desvios locais no eixo de fácil magnetização, além da formação de domínios magnéticos, não previstos no nosso modelo teórico. No entanto, mesmo com a simplicidade do modelo teórico aqui abordado, que não leva em consideração a evolução nas curvas associada à dispersão de anisotropia magnética, podemos descrever as principais características do comportamento magnético de amostras ferromagnéticas na forma de filmes. Através da consideração de pequenos desvios da anisotropia modelada, pode-se induzir um “arredondamento” nas curvas, simulando, assim, o padrão verificado experimentalmente. Para os cálculos numéricos apresentados nas Figuras 3(a,b), consideramos os seguintes parâmetros:  $M_s = 780 \text{ emu/cm}^3$ ,  $H_k = 5.6 \text{ Oe}$ ,  $\theta_k = 90^\circ$  e  $\varphi_k = 2^\circ$ , calculadas para os valores de  $\varphi_H = 18^\circ$  e  $78^\circ$ , respectivamente. Note a impressionante semelhança entre os resultados experimentais e os cálculos numéricos.

Os parâmetros que descrevem a amostra são estabelecidos a partir da modelagem das curvas de magnetização e podem ser utilizados também para descrever o comportamento do efeito Magnetoimpedância. Somados aos valores previamente mencionados, assumimos:  $\varphi_H = 90^\circ$ ,  $s = 100 \text{ nm}$ ,  $\rho = 7.56 \times 10^{-6} \text{ } \Omega/\text{cm}$ ,  $\gamma = 18.6 \times 10^6 \text{ Oe}^{-1}\text{s}^{-1}$  [17] e  $\alpha = 0.008$ . A partir das Eqs. (6), (2) e (7), a impedância em função do campo magnético e frequência para um filme fino com anisotropia uniaxial pode ser calculada. As Figuras 3(c,d) mostram os dados experimentais e cálculos numéricos de  $Z$  em função de  $H$  para valores selecionados de  $f$ .

Como previsto, para esta faixa de frequência, o efeito FMR é o principal mecanismo responsável pelas variações de impedância. Este fato é corroborado pela mudança na posição dos picos de impedância em campo, picos estes que se deslocam para valores maiores de campo à medida que a frequência aumenta. Além disto, conforme previamente verificado teoricamente (Figura 2(b,c)), observamos um aumento da intensidade dos picos de impedância até uma frequência de 1.5 GHz, seguido de uma diminuição para frequências mais altas. Esta característica é resultado das mudanças nas contribuições das partes real  $R$  e imaginária  $X$  de  $Z$  na amostra. Neste caso específico, a componente imaginária parece comandar a impedância elétrica total à medida que a frequência aumenta, fazendo com que o formato das curvas de  $Z$  seja semelhante ao de  $X$ . Neste contexto, a parte elétrica da impedância (não magnética) tem um papel fundamental para descrever as curvas experimentais. Lembremos, como já discutido,

que o modelo aqui proposto descreve as mudanças da impedância em função das propriedades magnéticas. Assim, o comportamento elétrico das partes real e imaginária de impedância deve ser obtida para cada sistema estudado.

A questão mais notável que destacamos aqui reside no fato de que, apesar de sua simplicidade, a abordagem teórica abordada é capaz de descrever as principais características magnéticas da amostra modelada, tanto dentro contexto de propriedades quase-estáticas quanto dinâmicas da magnetização. Para destacar o potencial desta abordagem, valem ressaltar resultados prévios já publicados na literatura envolvendo outros sistemas físicos que também foram bem descritos. Especificamente, utilizando procedimentos semelhantes, as propriedades magnéticas de sistemas com anisotropia uniaxial e que apresentavam *Exchange Bias* [21] e sistemas com propriedades magnetostrictivas [22] foram exploradas, trazendo informações importantes sobre o comportamento magnético destes sistemas.

## 4. Conclusões

Em suma, aqui apresentamos uma forma acessível, mas robusta, de calcular o Efeito Magnetoimpedância em sistemas na forma de filmes finos. Esta tem como ponto de partida a definição apropriada da densidade de energia livre magnética, passando pela descrição da permeabilidade magnética transversal que leva em consideração sua dependência com  $f$  e  $H$ , e, finalmente, chegando à expressão para as componentes real e imaginária da impedância. Os cálculos aqui desenvolvidos podem ser facilmente realizados em linguagens de código aberto disponíveis atualmente, como em Python, por exemplo. Para verificar a robustez de nossa abordagem teórica, produzimos um filme fino ferromagnético de  $\text{Ni}_{81}\text{Fe}_{19}$ , uma liga amplamente conhecida na comunidade de magnetismo, e realizamos sua caracterização magnética quase-estática e dinâmica. Nosso resultados, além de demonstrar a concordância entre teoria e experimento, trazem uma forma simples para descrever sistemas ferromagnéticos e suas interações com campos magnético estáticos e alternados, simultaneamente. Através da investigação das propriedades de sistemas magnéticos, materiais magnéticos podem ser produzidos e utilizados em uma ampla gama de dispositivos tecnológicos.

## Agradecimentos

Os autores agradecem à organização da Escola Brasileira de Magnetismo (EBM) de 2023, ocorrida em Porto Alegre, que nos proporcionou a oportunidade de divulgar o efeito Magnetoimpedância, uma importante linha de pesquisa em nanociência e nanotecnologia, para a comunidade da RBEF. MAC, MG, EFS e FB agradecem ao CNPq pelo suporte financeiro através das bolsas de Produtividade em Pesquisa, bem como

à CAPES pelo financiamento dado aos estudantes do Grupo de Magnetismo (GMAG) e do Laboratório de Propriedades Física de Materiais Cerâmicos (LaPFiMC) da UFRN para participação na EBM. Por fim, os autores agradecem ao INCT of Spintronics and Advanced Magnetic Nanostructures (INCT-SpinNanoMag), CNPq 406836/2022-1.

## Apêndice

### Métodos

Para testar o modelo proposto, produzimos um filme fino ferromagnético de  $\text{Ni}_{81}\text{Fe}_{19}$  por *Magnetron Sputtering* a partir de um alvo comercial com 99,99% de pureza. A deposição foi realizada sobre um substrato de vidro com dimensões de  $10 \times 4 \text{ mm}^2$ , considerando-se os seguintes parâmetros experimentais: pressão de base da ordem de  $10^{-7}$  Torr, pressão de trabalho de  $2.0 \times 10^{-3}$  Torr com um fluxo de Ar a 32 sccm, e fonte de tensão DC com potência de 50 W. Estes parâmetros resultaram em uma taxa de deposição de 0.4 nm/s. Para induzir uma anisotropia uniaxial no filme, um campo magnético de 1.5 kOe foi aplicado ao substrato durante a deposição, orientado no plano do filme e perpendicularmente à direção do comprimento do substrato. Para este trabalho, depositamos um filme fino com espessura de 50 nm.

A caracterização magnética quase-estática foi realizada através de medidas de magnetização, adquiridas utilizando-se um Magnetômetro de Amostra Vibrante. Medidas foram realizadas com campo magnético no plano do filme fino, orientado em duas direções, isto é, paralela e perpendicular à direção definida pela campo aplicado durante a deposição da amostra. Todas as medidas foram realizada a temperatura ambiente e com campos máximos de  $\pm 250$  Oe.

As medidas de magnetoimpedância foram realizadas utilizando um analisador de impedância (Agilent 4991), com capacidade de medidas na faixa de 100 kHz até 3.0 GHz. O sistema foi adaptado para as medidas em questão e conta com um solenoide para gerar o campo magnético externo e um porta amostra na forma de *stripline*, conforme esquematizado na Figura A1. Medidas de MI foram realizadas aplicando-se o campo magnético perpendicularmente à direção do eixo de fácil magnetização. Considerando que assumimos como referencial a orientação estabelecida pelo campo aplicado durante a produção da amostra, esta situação corresponde a  $\varphi_H = 90^\circ$  um vez que  $\varphi_k = 0^\circ$ . O *stripline* é conectado ao analisador de impedância através de um conector APC7. Previamente à realização do experimento, o sistema foi inicialmente calibrado com um padrão de aberto/curto/carga (50  $\Omega$ ). As aquisições foram realizadas considerando-se uma potência de 1 mW (0 dBm), a fim de garantir medidas no regime linear. Assim, para cada valor de campo magnético, a frequência foi variada e as componentes real  $R$  e imaginária  $X$  da impedância foram simultaneamente adquiridas [14, 22, 23].

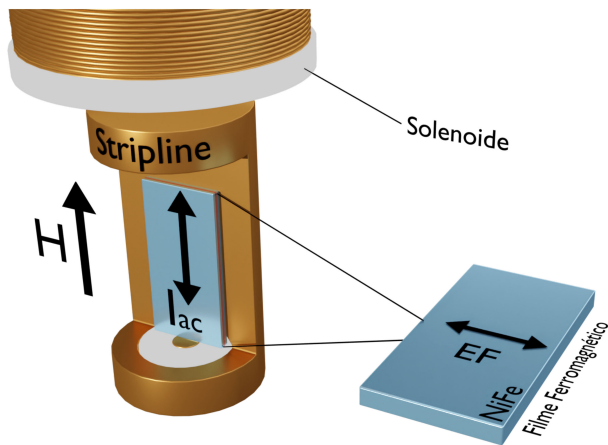

**Figura A1:** (a) Representação esquemática da configuração de campos envolvida em um experimento de magnetoimpedância e procedimento experimental para medidas de magnetoimpedância em filmes finos. O campo magnético externo  $\vec{H}$  é produzido por um solenoide que envolve o *stripline*, no qual a amostra atua como condutor central. À direita, visão detalhada da amostra com formato retangular. Note que  $I_{ac}$  flui ao longo de seu comprimento, perpendicularmente à direção do eixo de fácil magnetização (EF) induzido durante a deposição do filme de  $Ni_{81}Fe_{19}$ .

- [13] G.L.S. Vilela, J.G. Monsalve, A.R. Rodrigues, A. Azevedo e F.L.A. Machado, *Journal of Applied Physics* **121**, 124501 (2017).
- [14] M. Correa e F. Bohn, *Journal of Magnetism and Magnetic Materials* **453**, 30 (2018).
- [15] M.A. Correa, F. Bohn, R.B. Silva e R.L. Sommer, *J. Appl. Phys.* **116**, 243904 (2014).
- [16] L. Kraus, *J. Magn. Magn. Mater.* **195**, 764 (1999).
- [17] G. Gubbiotti, G. Carlotti, T. Ono e Y. Roussigne, *J. Appl. Phys.* **100**, 023906 (2006).
- [18] M.A. Corrêa, F. Bohn, V.M. Escobar, M.S. Marques, A.D.C. Viegas, L.F. Schelp e R.L. Sommer, *J. Appl. Phys.* **110**, 93914 (2011).
- [19] A.M.H. Andrade, M.A. Corrêa, A.D.C. Viegas, F. Bohn e R.L. Sommer, *J. Appl. Phys.* **115**, 103908 (2014).
- [20] E.F. Silva, M. Gamino, A.B. Oliveira, M.A. Correa e F. Bohn, *Scientific Reports* **13**, 4409 (2023).
- [21] R.B. Silva, M.A. Correa, E.F. Silva, T.J.A. Mori, R.D.D. Pace, R. Dutra, A.D.C. Viegas, F. Bohn e R.L. Sommer, *App. Phys. Lett.* **104**, 102401 (2014).
- [22] K. Agra, F. Bohn, T. Mori, G. Callegari, L. Dorneles e M. Correa, *Journal of Magnetism and Magnetic Materials* **420**, 81 (2016).
- [23] M. Correa, J. Santos, B. Silva, S. Raza, R.D. Pace, C. Chesman, R. Sommer e F. Bohn, *Journal of Magnetism and Magnetic Materials* **485**, 75 (2019).

## Referências

- [1] E.P. Harrison, G.L. Turney, H. Rowe e H. Gollop, *Proceedings of the Royal Society of London. Series A – Mathematical and Physical Sciences* **157**, 451 (1936).
- [2] M.N. Baibich, J.M. Broto, A. Fert, F.N.V. Dau, F. Petroff, P. Etienne, G. Creuzet, A. Friederich e J. Chazelas, *Physical Review Letters* **61**, 2472 (1988).
- [3] K. Mohri, T. Kohsawa, K. Kawashima, H. Yoshida e L.V. Panina, *IEEE Trans. Magn.* **28**, 3150 (1992).
- [4] R.L. Sommer e C.L. Chien, *Appl. Phys. Lett.* **67**, 857 (1995).
- [5] R.S. Beach e A.E. Berkowitz, *Journal of Applied Physics* **76**, 6209 (1994).
- [6] J. Velázquez, M. Vázquez, D.X. Chen e A. Hernando, *Phys. Rev. B* **50**, 16737 (1994).
- [7] K. Mohri, L.V. Panina, T. Uchiyama, K. Bushida e M. Noda, *IEEE Trans. Magn.* **31**, 1266 (1995).
- [8] F.L.A. Machado, C.S. Martins e S.M. Rezende, *Phys. Rev. B* **51**, 3926 (1995).
- [9] S.O. Volchkov, A.A. Pasyankova, M.S. Derevyanko, D.A. Bukreev, N.V. Kozlov, A.V. Svalov e A.V. Semirov, *Sensors* **21**, 6728 (2021).
- [10] G.Y. Melnikov, V.N. Lepalovskij, A.V. Svalov, A.P. Safonov e G.V. Kurlyandskaya, *Sensors* **21**, 3621 (2021).
- [11] S. Gudoshnikov, V. Tarasov, B. Liubimov, V. Odintsov, S. Venediktov e A. Nozdrin, *Journal of Magnetism and Magnetic Materials* **510**, 166938 (2020).
- [12] J. Liu, X. Wang, Z. Li, Y. Zhang, G. Cao, M. Huang e H. Shen, *Materials Today Communications* **20**, 100605 (2019).
